# Supplementary material for: Microglial lysosome dysfunction contributes to white matter pathology and TDP-43 proteinopathy in GRN-associated FTD
Source: PubMed Central journal article supplement — Cell Rep. Author manuscript; Available in PMC 2021 Oct 5. (PMC8491969; doi:10.1016/j.celrep.2021.109581), 2021-08-24
Supplement: NIHMS1735791-supplement-1.pdf [file NIHMS1735791-supplement-1.pdf]

**Supplemental information**

**Microglial lysosome dysfunction  
contributes to white matter pathology  
and TDP-43 proteinopathy in *GRN*-associated FTD**

**Yanwei Wu, Wei Shao, Tiffany W. Todd, Jimei Tong, Mei Yue, Shunsuke Koga, Monica Castanedes-Casey, Ariston L. Librero, Chris W. Lee, Ian R. Mackenzie, Dennis W. Dickson, Yong-Jie Zhang, Leonard Petrucelli, and Mercedes Prudencio**

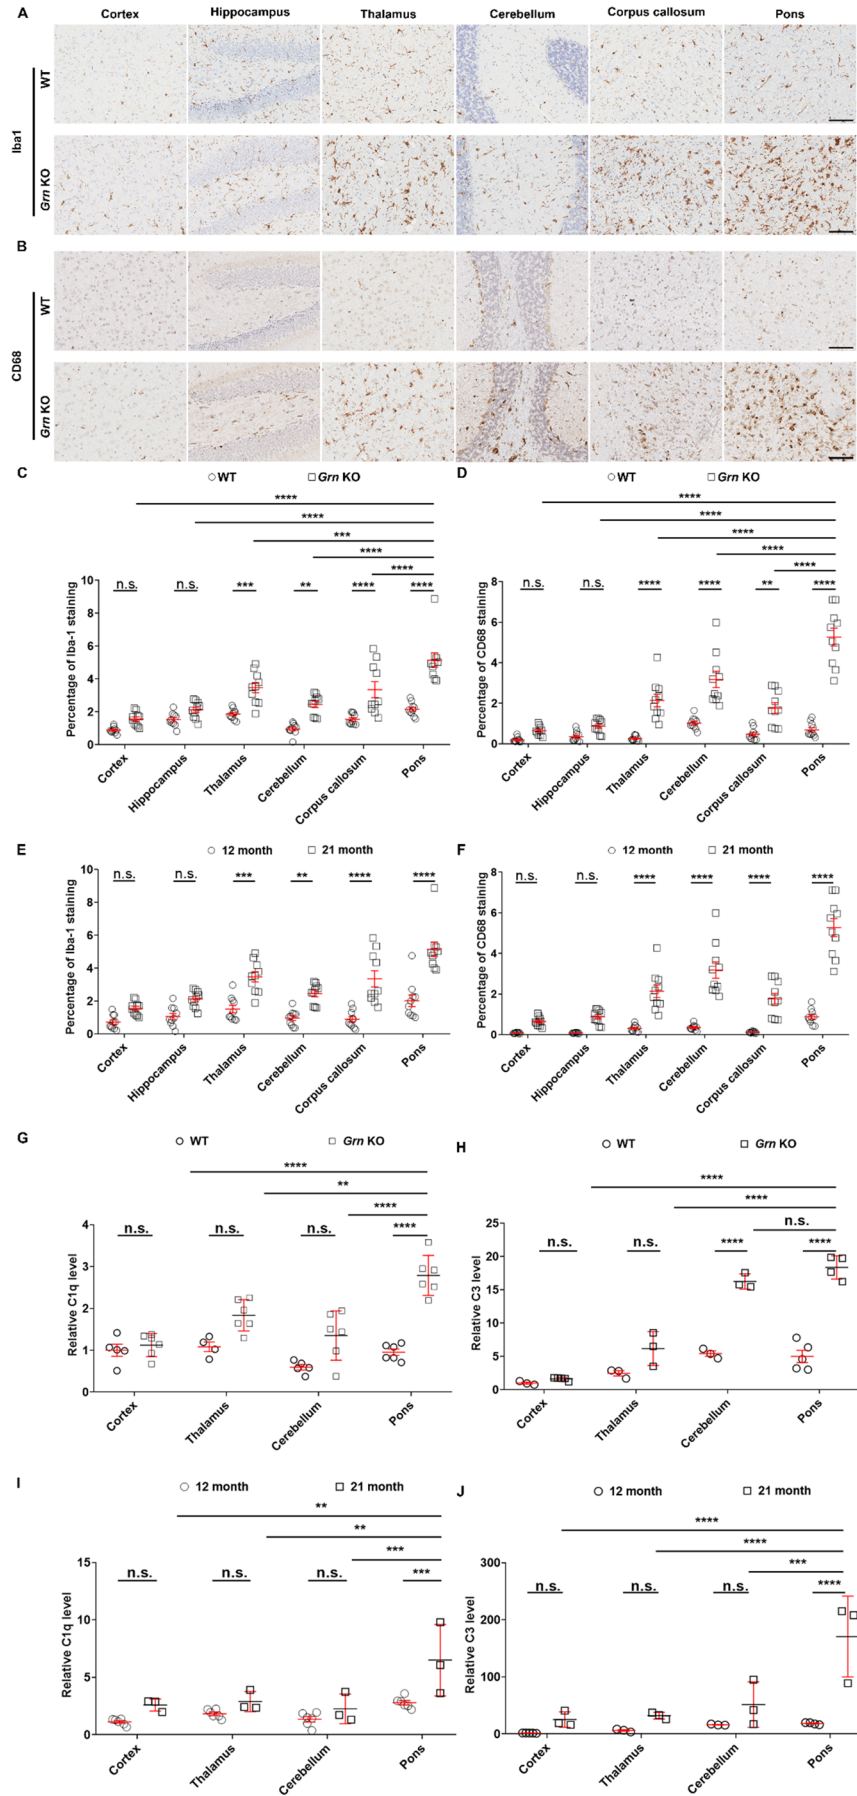

**Figure S1. An age-dependent increase in microglial activation is observed in white matter regions of *Grn* KO mice.** Related to Figure 1. (A-F) Representative images (A, B) and quantitative analyses (C-F) of Iba1 (A, C, E) and CD68 (B, D, F) staining in different brain regions of 21-month-old (A-F) and 12-month old (E, F) wild-type (WT) and *Grn* KO mice (n = 10 per group). Scale bar, 50  $\mu$ m. (G-J) Quantitative RT-PCR analyses of C1q (G, I) and C3b (H, J) RNA levels in different brain regions of 21-month-old (G-J) and 12-month-old (I, J) wild-type (WT) and *Grn* KO mice (n = 3-6 per group). Data are presented as mean  $\pm$  S.E.M.  $**P < 0.01$ ,  $***P < 0.001$ ,  $****P < 0.0001$ , 2-way ANOVA, Tukey's multiple-comparison test. n.s.: not significant.

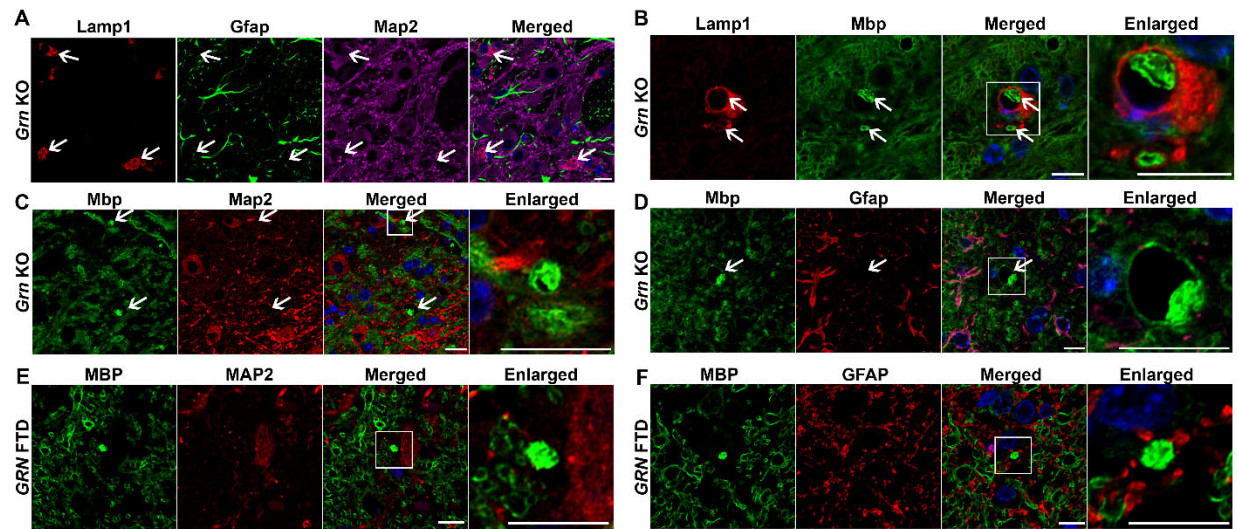

**Figure S2. Mbp-positive myelin deposits accumulate in microglial lysosomes in *Grn* KO mice and cases with *GRN* FTD.** Related to Figures 1 and 2. (A, B) Representative images of the pons of 21-month-old *Grn* KO mice co-stained for lysosome (Lamp1) and astrocyte (Gfap) and neuron (Map2) markers (A), and lysosome (Lamp1) and oligodendrocyte (Mbp) markers (B). Arrows indicate enlarged lysosomes. (C, D) Representative images of myelin (Mbp) and neuron marker (Map2) (C), and myelin (Mbp) and astrocyte marker (Gfap) (D) co-staining in the pons of 21-month-old *Grn* KO mice. Arrows indicate myelin debris. (E, F) Representative images of myelin (MBP) and neuron marker (MAP2) (E), and myelin (MBP) and astrocyte marker (GFAP) (F) in the pons of *GRN* FTD. Boxes in B-F indicate the region enlarged in the enlarged panel. Scale bar, 10  $\mu$ m.

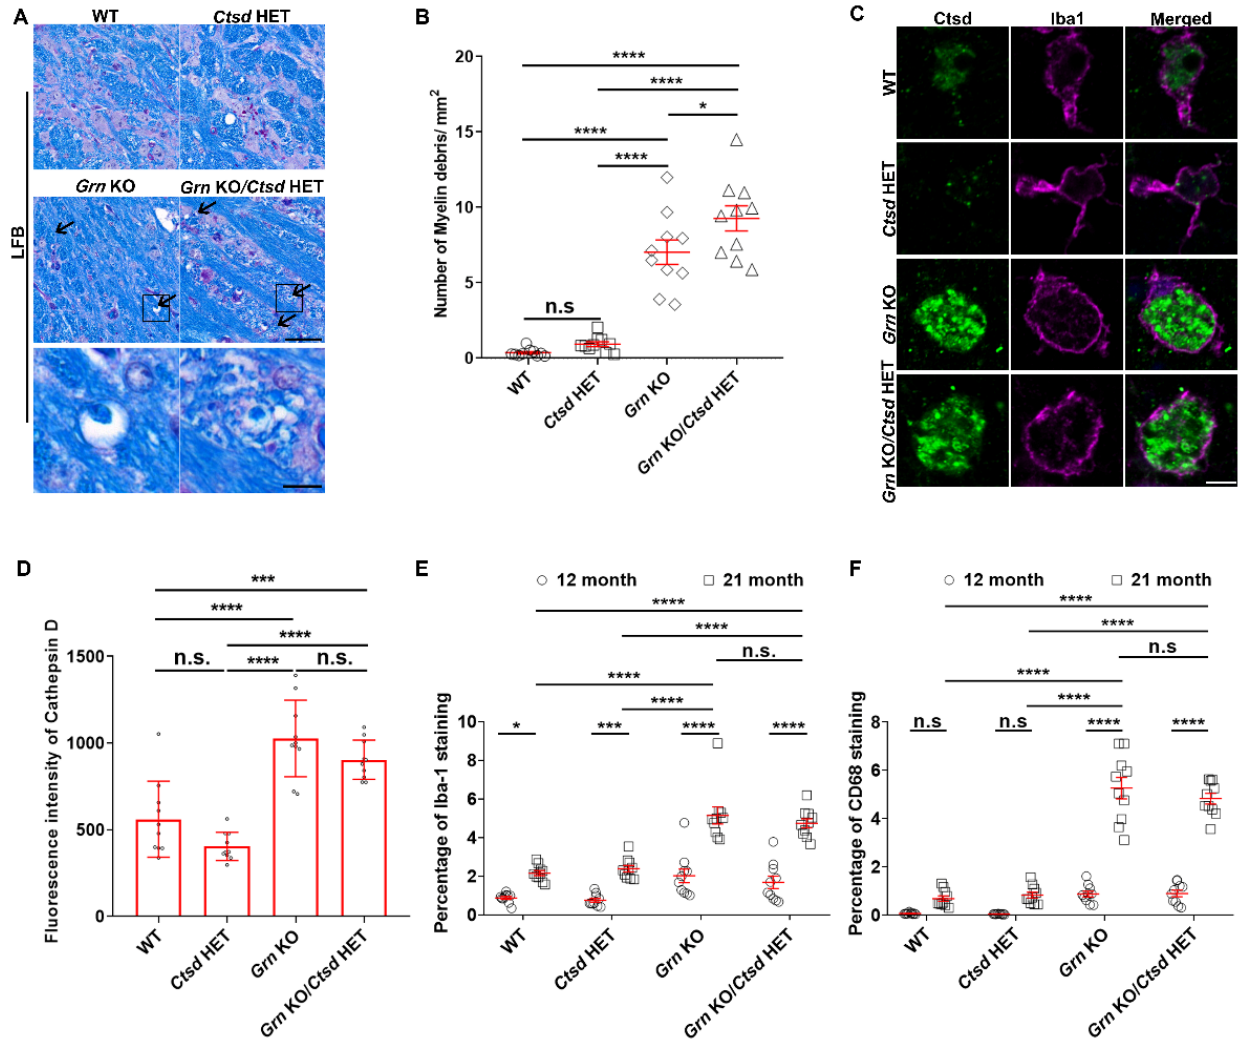

**Figure S3. The accumulation of myelin debris, but not microgliosis, in *Grn* KO mice is further enhanced by partial loss of *Cttsd*.** Related to Figure 3. (**A**, **B**) Representative images (**A**) and quantitative analysis (**B**) of myelin staining (LFB) in the pons of 21-month-old WT, *Cttsd* HET, *Grn* KO or *Grn* KO/*Cttsd* HET mice (n = 10 per group). Arrows indicate myelin debris. Boxes in **A** indicate the region enlarged below. (**C**, **D**) Representative images (**C**) and quantitative analysis (**D**) of microglia *Cttsd* staining in the pons of 21-month-old WT, *Cttsd* HET, *Grn* KO or *Grn* KO/*Cttsd* HET mice (n = 10 per group). (**E**, **F**) Quantitative analysis of Iba1 (**E**) and CD68 (**F**) staining in the pons of 12- and 21-month-old WT, *Cttsd* HET, *Grn* KO or *Grn* KO/*Cttsd* HET mice (n = 10 per group). Scale bar, 50  $\mu$ m (**A**), and 10  $\mu$ m (**C**). All data are presented as mean  $\pm$  S.E.M. \* $P$  < 0.05, \*\*\* $P$  < 0.001, \*\*\*\* $P$  < 0.0001, 2-way ANOVA, Tukey's multiple-comparison test. n.s.: not significant.

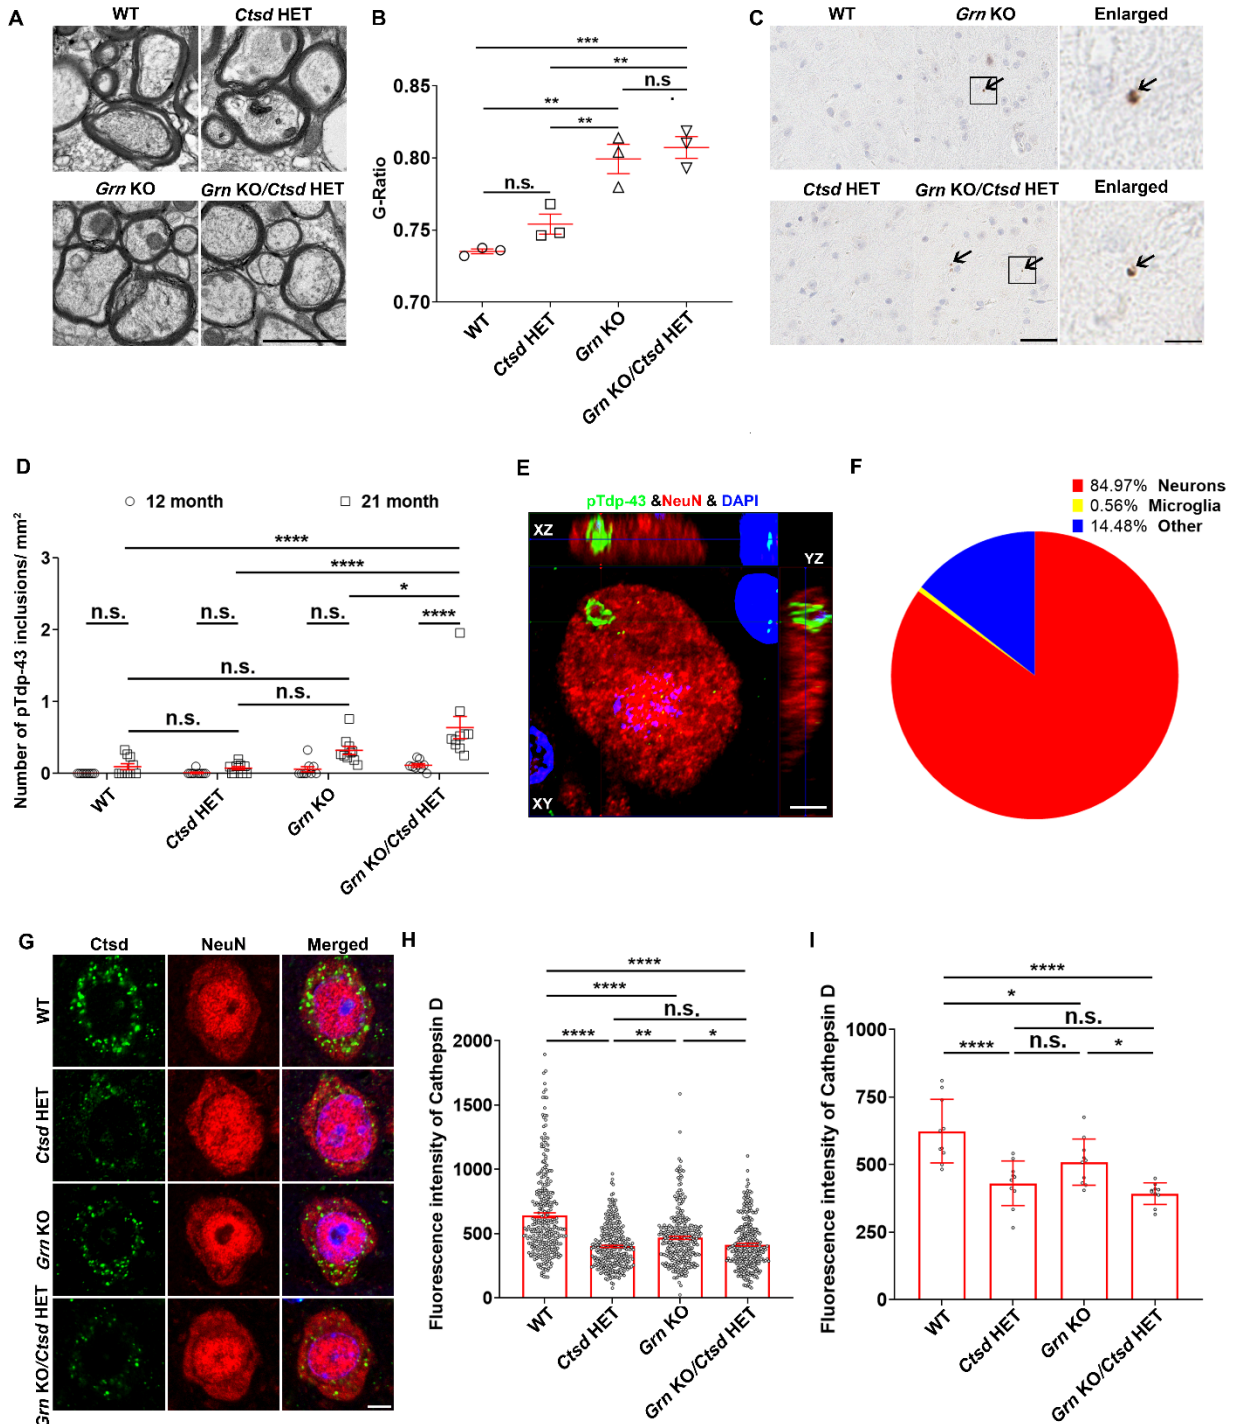

**Figure S4. Demyelination and pTdp-43 inclusions are observed in *Grn* KO and *Grn* KO/*Ctsd* HET mice.** Related to Figure 4. (**A**, **B**) Representative images (**A**) and quantitative analysis of G-ratio (**B**) of myelinated axons in pons of 12-month-old WT, *Ctsd* HET, *Grn* KO and *Grn* KO/*Ctsd* HET mice (n= 3 per group). (**C** and **D**) Representative images (**C**) in the thalamus of 21-month-old *Grn* KO mice and quantitative analysis (**D**) of pTdp-43 staining in the same region of 12- and 21-month-old WT, *Ctsd* HET, *Grn* KO or *Grn* KO/*Ctsd* HET mice (n = 10 per

group). **(E)** Z-stack confocal image of pTdp-43 and NeuN co-staining in pons of a representative 21-month-old *Grn* KO mouse. **(F)** Quantification analysis of percentage of pTdp-43 in different cell types (n=10). **(G-I)** Representative images **(G)** and quantitative analyses **(H, I)** of neuronal Ctsd staining in the pons of 21-month-old WT, *Ctsd* HET, *Grn* KO or *Grn* KO/*Ctsd* HET mice (n = 300 cells per group for **H**, n= 10 mice per group for **I**). Scale bar, 2  $\mu$ m **(A)**, 5  $\mu$ m **(E)**, 10  $\mu$ m **(G)** and 50  $\mu$ m **(C)**. Data in graphs is presented as mean  $\pm$  S.E.M. Statistical differences result from a 2-way ANOVA **(D)** or one-way ANOVA **(B, H, I)**, followed by Tukey's multiple-comparison test. \* $P < 0.05$ , \*\* $P < 0.01$ , \*\*\* $P < 0.001$ , \*\*\*\* $P < 0.0001$ , n.s.: not significant

**Table S1. Clinical characteristics associated with the samples from patients with FTD used in this study.** Related to Figure 2.

| <b>Case #</b> | <b>Sex</b> | <b>Age at onset (yrs)</b> | <b>Disease duration (yrs)</b> | <b><i>Grn</i> gene status</b> |
|---------------|------------|---------------------------|-------------------------------|-------------------------------|
| 1             | Male       | 77                        | 10                            | Negative                      |
| 2             | Male       | 61                        | 3                             | Negative                      |
| 3             | Male       | 70                        | 11                            | Negative                      |
| 4             | Male       | 61                        | 3                             | Negative                      |
| 5             | Male       | 67                        | 1                             | Negative                      |
| 6             | Female     | 88                        | N/A                           | Negative                      |
| 7             | Female     | 81                        | 3                             | Negative                      |
| 8             | Male       | 70                        | 7                             | Negative                      |
| 9             | Female     | 73                        | 10                            | Positive                      |
| 10            | Male       | 72                        | 10                            | Positive                      |
| 11            | Male       | 60                        | 6                             | Positive                      |
| 12            | Female     | 69                        | 6                             | Positive                      |
| 13            | Male       | 63                        | 5                             | Positive                      |
| 14            | Female     | 67                        | 3                             | Positive                      |
| 15            | Female     | 71                        | 3                             | Positive                      |
| 16            | Male       | 60                        | 10                            | Positive                      |
| 17            | Male       | 60                        | 6                             | Positive                      |

N/A: not available

**Table S2. Primary antibodies for immunohistochemistry and immunofluorescence staining.** Related to STAR Methods.

| Antibody         | Species | Dilution         | Application | Origin                                                                         | Catalog number |
|------------------|---------|------------------|-------------|--------------------------------------------------------------------------------|----------------|
| anti-pTdp-43     | rabbit  | 1:1000           | IHC, IF     | RB3655: Antibody described in J. Chew et al.,<br>Science 348, 1151-1154 (015). | N/A            |
| anti-Iba1        | rabbit  | 1:3000<br>1:1000 | IHC<br>IF   |                                                                                | 019-19741      |
| anti-CD68        | rabbit  | 1:250<br>1:500   | IHC<br>IF   | Abcam                                                                          | ab125212       |
| anti-Mbp         | mouse   | 1:500            | IHC, IF     | R&D systems                                                                    | MAB42282       |
| anti-Lamp1       | rat     | 1:500            | IF          | Invitrogen                                                                     | 14-1071-82     |
| anti-Map2        | mouse   | 1:500            | IF          | Sigma                                                                          | M1406          |
| anti-Gfap        | rabbit  | 1:2000           | IF          | Biogenex                                                                       | PU020-UP       |
| anti-Cathepsin D | rabbit  | 1:500            | IF          | ProteinTech                                                                    | 21327-1-AP     |
| anti-Ubi1        | mouse   | 1:1000           | IF          | EMD Millipore                                                                  | MAB1510        |
| anti-NeuN        | mouse   | 1:1000           | IF          | Chemicon International                                                         | MAB377         |

IHC: Immunohistochemistry; IF: Immunofluorescence; N/A: not applicable
